# Supplementary material for: Expression of gain-of-function CFTR in cystic fibrosis airway cells restores epithelial function better than wild-type or codon-optimized CFTR
Source: PubMed Central journal article supplement — Mol Ther Methods Clin Dev. 2023 Aug 12;30:593–605. doi: 10.1016/j.omtm.2023.08.006 (PMC10494266; doi:10.1016/j.omtm.2023.08.006), 2023-08-12
Supplement: mmc1.pdf [file mmc1.pdf]

OMTM, Volume 30

## **Supplemental information**

**Expression of gain-of-function CFTR in cystic fibrosis  
airway cells restores epithelial function better than  
wild-type or codon-optimized CFTR**

**Maximillian Woodall, Robert Tarran, Rhianna Lee, Hafssa Anfishi, Stella Prins, John  
Counsell, Paola Vergani, Stephen Hart, and Deborah Baines**

Supplemental Material

Table S1. Demographics of human bronchial epithelial cell donors.

|                        | Donor | Age at collection | Sex | Ethnicity | Genotype        | Smoking history |
|------------------------|-------|-------------------|-----|-----------|-----------------|-----------------|
| <b>Normal (Non-CF)</b> | 1     | 49                | M   | Caucasian | N/A             | <1PY            |
|                        | 2     | 30                | M   | Caucasian | N/A             | non-smoker      |
|                        | 3     | 43                | M   | Caucasian | N/A             | non-smoker      |
|                        | 4     | 25                | F   | Caucasian | N/A             | non-smoker      |
| <b>CF</b>              | 1     | 26                | M   | Caucasian | F508del/F508del | non-smoker      |
|                        | 2     | 28                | F   | Caucasian | F508del/F508del | non-smoker      |
|                        | 3     | 28                | F   | Unknown   | F508del/F508del | non-smoker      |
|                        | 4     | 36                | F   | Caucasian | F508del/F508del | non-smoker      |
|                        | 5     | 28                | M   | Unknown   | F508del/F508del | non-smoker      |
|                        | 6     | 34                | F   | Unknown   | W1282X/R1162X   | non-smoker      |
|                        | 7     | 41                | M   | Unknown   | W1282X/R1162X   | non-smoker      |

<IPY, less than one pack per year smoking history.

Table S2. Demographics of induced sputum donors (pooled for CF sputum).

|                                   | Donor | Age at collection | Sex | Ethnicity        | FEV <sub>1</sub> | FVC <sub>1</sub> | Genotype              |
|-----------------------------------|-------|-------------------|-----|------------------|------------------|------------------|-----------------------|
| <b>CF sputum samples</b>          | 1     | 49                | F   | Caucasian        | 1.21             | 2.28             | F508del/F508del       |
|                                   | 2     | 30                | F   | Caucasian        | 2.89             | 4.02             | F508del/2184insA      |
|                                   | 3     | 43                | M   | Caucasian        | 0.92             | 2.46             | 3849+10kbC>T/C3659del |
|                                   | 4     | 25                | M   | Caucasian        | 1.29             | 2.40             | F508del/F508del       |
|                                   | 5     | 26                | M   | Caucasian        | 2.38             | 4.46             | F508del/F508del       |
|                                   | 6     | 28                | F   | Caucasian        | 1.21             | 2.35             | F508del/F508del       |
|                                   | 7     | 28                | M   | Caucasian        | 2.27             | 3.30             | F508del/G451V         |
|                                   | 8     | 36                | M   | Caucasian        | 1.32             | 3.33             | F508del/S945L         |
|                                   | 9     | 28                | M   | Caucasian        | 1.00             | 2.00             | F508del/F508del       |
|                                   | 10    | 34                | M   | Caucasian        | 1.09             | 2.38             | 3849+10kbC>T/C3659del |
| <b>Normal Lung sputum samples</b> | 1     | 22                | F   | Caucasian        | 3.29             | 2.28             | N/A                   |
|                                   | 2     | 20                | F   | African American | 3.03             | 4.02             | N/A                   |
|                                   | 3     | 25                | F   | Caucasian        | 3.97             | 2.46             | N/A                   |
|                                   | 4     | 28                | M   | Asian            | 4.78             | 2.40             | N/A                   |
|                                   | 5     | 19                | F   | Caucasian        | 2.81             | 4.46             | N/A                   |
|                                   | 6     | 25                | F   | Caucasian        | 3.28             | 2.35             | N/A                   |
|                                   | 7     | 29                | F   | Asian            | 4.71             | 3.30             | N/A                   |
|                                   | 8     | 23                | F   | African American | 2.43             | 3.33             | N/A                   |
|                                   | 9     | 34                | M   | Caucasian        | 5.97             | 2.00             | N/A                   |
|                                   | 10    | 34                | F   | Caucasian        | 3.31             | 2.38             | N/A                   |

Table S3. Primary antisera.

| Name                                 | Species | Dilution     | Catalogue# | Supplier                                |
|--------------------------------------|---------|--------------|------------|-----------------------------------------|
| Anti- $\alpha$ -Tubulin, clone YL1/2 | Rat     | 3 $\mu$ g/mL | mab1864    | Sigma-Aldrich                           |
| Anti-CFTR 596                        | Mouse   | 1:2000       | A4         | Cystic Fibrosis Foundation Therapeutics |
| Anti-GFP - CHIP Grade                | Rabbit  | 1:5000       | ab290      | Abcam                                   |

Table S4. Secondary antisera and fluorophores

| Name                              | Species | Fluorophore      | Dilution | Catalogue # | Supplier                 |
|-----------------------------------|---------|------------------|----------|-------------|--------------------------|
| Anti-Mouse IgG                    | Donkey  | Alexa Fluor 594  | 1:1000   | A32744      | Thermo Scientific Fisher |
| Anti-Goat IgG                     | Donkey  | Alexa Fluor 555  | 1:1000   | A32816      | Thermo Scientific Fisher |
| Anti-Rabbit IgG                   | Donkey  | Alexa Fluor 488  | 1:1000   | 711-545-152 | Jackson ImmunoResearch   |
| Phalloidin                        | -       | Alexa Fluor 647  | 1:50     | A22287      | Thermo Scientific Fisher |
| DAPI                              | -       | Ex/Em 340/488 nm | 1:200    | D9542       | Sigma-Aldrich            |
| IRDye <sup>®</sup> anti-Mouse IgG | Goat    | 800CW            | 1:20000  | 926-32232   | LI-COR Biosciences       |

Table S5. Buffer composition.

| Solution              | Composition                                                                                                                                                                                     |
|-----------------------|-------------------------------------------------------------------------------------------------------------------------------------------------------------------------------------------------|
| NP-40 lysis buffer    | 25 mM Tris-HCL pH 7.4, 150mM NaCl, 1mM EDTA, 1% NP-40, 5% Glycerol. Add 1 tablet/10ml cOmplete™, Protease Inhibitor Cocktail at use                                                             |
| Ussing buffer         | 117 mM NaCl, 2.5 mM CaCl <sub>2</sub> , 4.7 mM KCl, 1.2 mM MgSO <sub>4</sub> , 25 mM NaHCO <sub>3</sub> , 1.2 mM KH <sub>2</sub> PO <sub>4</sub> , 11 mM D-glucose, 5 mM Hepes (pH 7.4)         |
| Cl free Ussing buffer | 115 mM Na-isethionate, 25 mM NaHCO <sub>3</sub> , 3mM Ca-gluconate, 2.4mM Mg-gluconate, 2.4mM K <sub>2</sub> HPO <sub>4</sub> , 1.1 mM KH <sub>2</sub> PO, 11 mM D-glucose, 5 mM Hepes (pH 7.4) |
| Blocking buffer       | 1% BSA, 1% fish gelatin, 0.1% Triton X-100, 5% normal goat serum (this can be replaced with BSA) in 1x TBS.                                                                                     |
| Standard buffer       | 140 mM NaCl, 4.7 mM KCl, 1.2 mM MgCl <sub>2</sub> , 5 mM HEPES, 2.5 mM CaCl <sub>2</sub> , 11 mM glucose, pH 7.4.                                                                               |
| DNA lysis buffer      | 10%SDS, 50 mM EDTA, 50 mM Tris-HCL, 100 mM NaCl, 5 mM DTT, 0.5 mM spermidine. Add Proteinase K 1:100 at use.                                                                                    |

Table S6. Primers.

| Name                                | Sequence 5'-3'                                                                | Supplier      |
|-------------------------------------|-------------------------------------------------------------------------------|---------------|
| K987C_F                             | GTGGGATTCTTAATAGATTCTCCTGCGATATAGCA<br>ATTTTGGATGACCTTC                       | Sigma-Aldrich |
| K978C_R                             | GAAGGTCATCCAAAATTGCTATATCGCAGGAGAA<br>TCTATTAAGAATCCCAC                       | Sigma-Aldrich |
| h^K987C_F                           | GCAGGAGGAATACTAAATAGATTTAGTTGCGATAT<br>AGCAATACTAGATGATCTACTACC               | Sigma-Aldrich |
| h^K978C_R                           | GGTAGTAGATCATCTAGTATTGCTATATCGCAACT<br>AAATCTATTTAGTATTCCTCCTGC               | Sigma-Aldrich |
| T2A_P16A_F                          | CGTGGAGGAGAATGCGGGCCCTATGCAGC                                                 | Sigma-Aldrich |
| T2A_P16A_R                          | GCTGCATAGGGCCCGCATTCTCCTCCACG                                                 | Sigma-Aldrich |
| AMEL_F                              | CCCTGGGCTCTGTAAAGAATAGTG                                                      | Amplification |
| AMEL_R                              | CAGGCTTGAGGCCAACCAT                                                           | Amplification |
| Amelogenin-X isoform<br>(AMELX+FAM) | 6-FAM-ATCCCAGATGTTTCTCAA-MGB-NFQ<br>Designed by (George <i>et al.</i> , 2013) | ddPCR         |
| Amelogenin-Y isoform<br>(AMELY+VIC) | VIC-CATCCCAAATAAAGTGGTT-MGN-NFQ<br>Designed by (George <i>et al.</i> , 2013)  | ddPCR         |

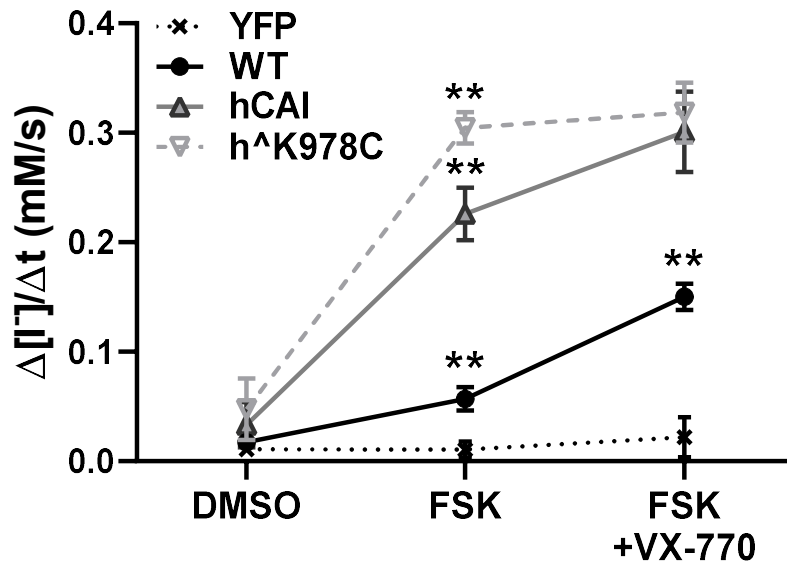

**Figure S1.** The maximal rate of  $I^-$  entry ( $\Delta[I^-]/\Delta t$ ) summarised for HEK293T cells transduced with CFTR cDNA and subject to treatment with DMSO (vehicle control), forskolin (FSK) or FSK + VX-770. Data are shown as mean values points and means  $\pm$  SD. Treatments were compared by two-way ANOVA with Tukey's post hoc analyses; Significantly different as shown \*:  $p < 0.05$ ; \*\*:  $p < 0.01$ ; \*\*\* :  $p < 0.001$ ,  $n=3$

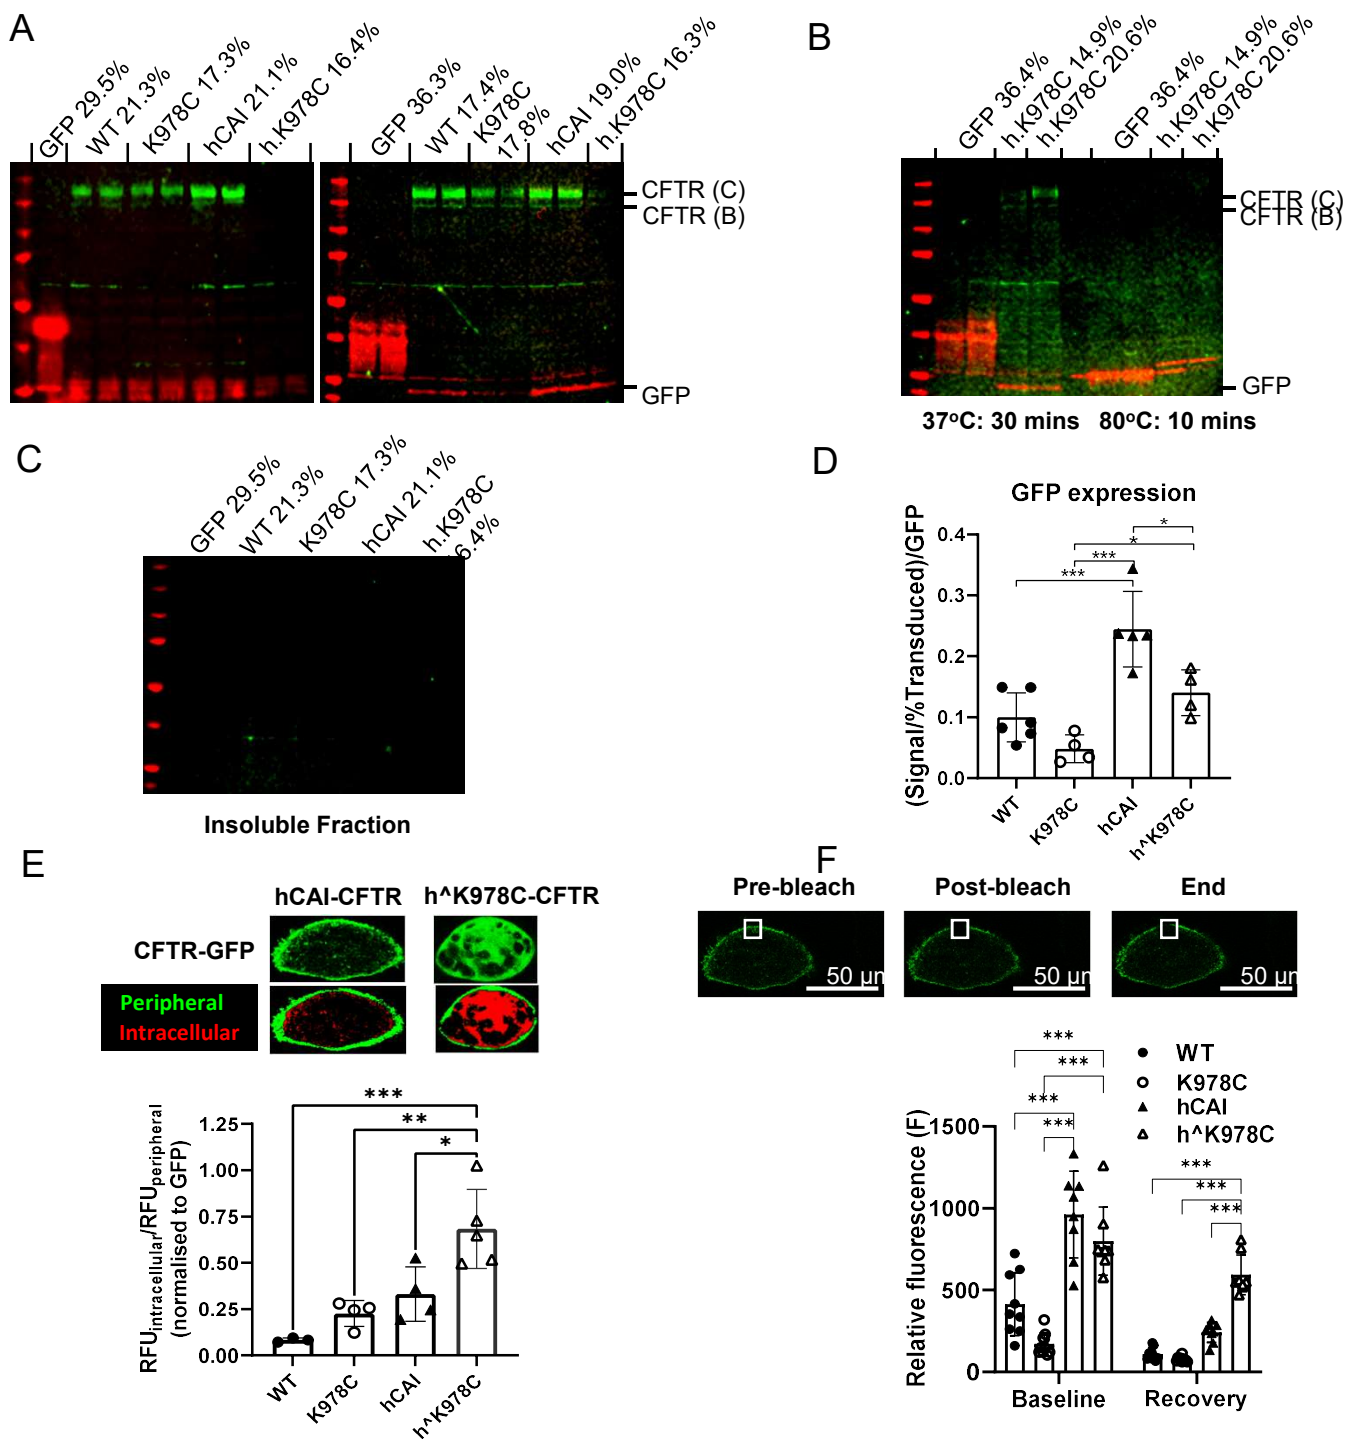

**Figure S2.** (A) Example western blot of lysate soluble fraction from CFBE cultures transduced with different CFTR cDNAs or GFP alone (as labelled above wells and run in duplicate). Blots were immunostained with anti-CFTR (CFTR 596) and anti-GFP. CFTR protein bands C and B (green), GFP (red) with molecular weight markers shown to the left of the blot (red). (B) Example western blot showing the difference in the CFTR and GFP proteins after different preparations of the same lysates (as labelled). (C) Example western blot of insoluble fractions from the same samples as shown in (a). (D) Summary of analysis of relative fluorescence units (RFU) for GFP bands relative to % transduced and normalised to GFP only transduced for each CFTR cDNA. Presented as mean  $\pm$  SD (n=4-7 from 3 donors). Treatments were compared by one-way ANOVA with Tukey's post hoc analyses; Significantly different \* p<0.05, \*\*\* p<0.001. (E) Quantification of the ratio of cytosolic GFP RFU (mask shows red) to peripheral GFP RFU (mask shows green) for each transduction, normalised to cytosolic GFP in cells transduced with GFP. Data are shown as mean  $\pm$  SD (n=2-5 from 1 CF donor). CFTR cDNAs were compared to WT CFTR by one-way ANOVA with Tukey's multiple comparisons test. Significantly different as shown; \*: p<0.05, \*\* p<0.01, \*\*\* p<0.001. (F) Summary of fluorescence (F) from region of interest (ROI) of greatest fluorescence on individual cells pre-bleach (baseline) and 70 seconds after bleach (recovery).

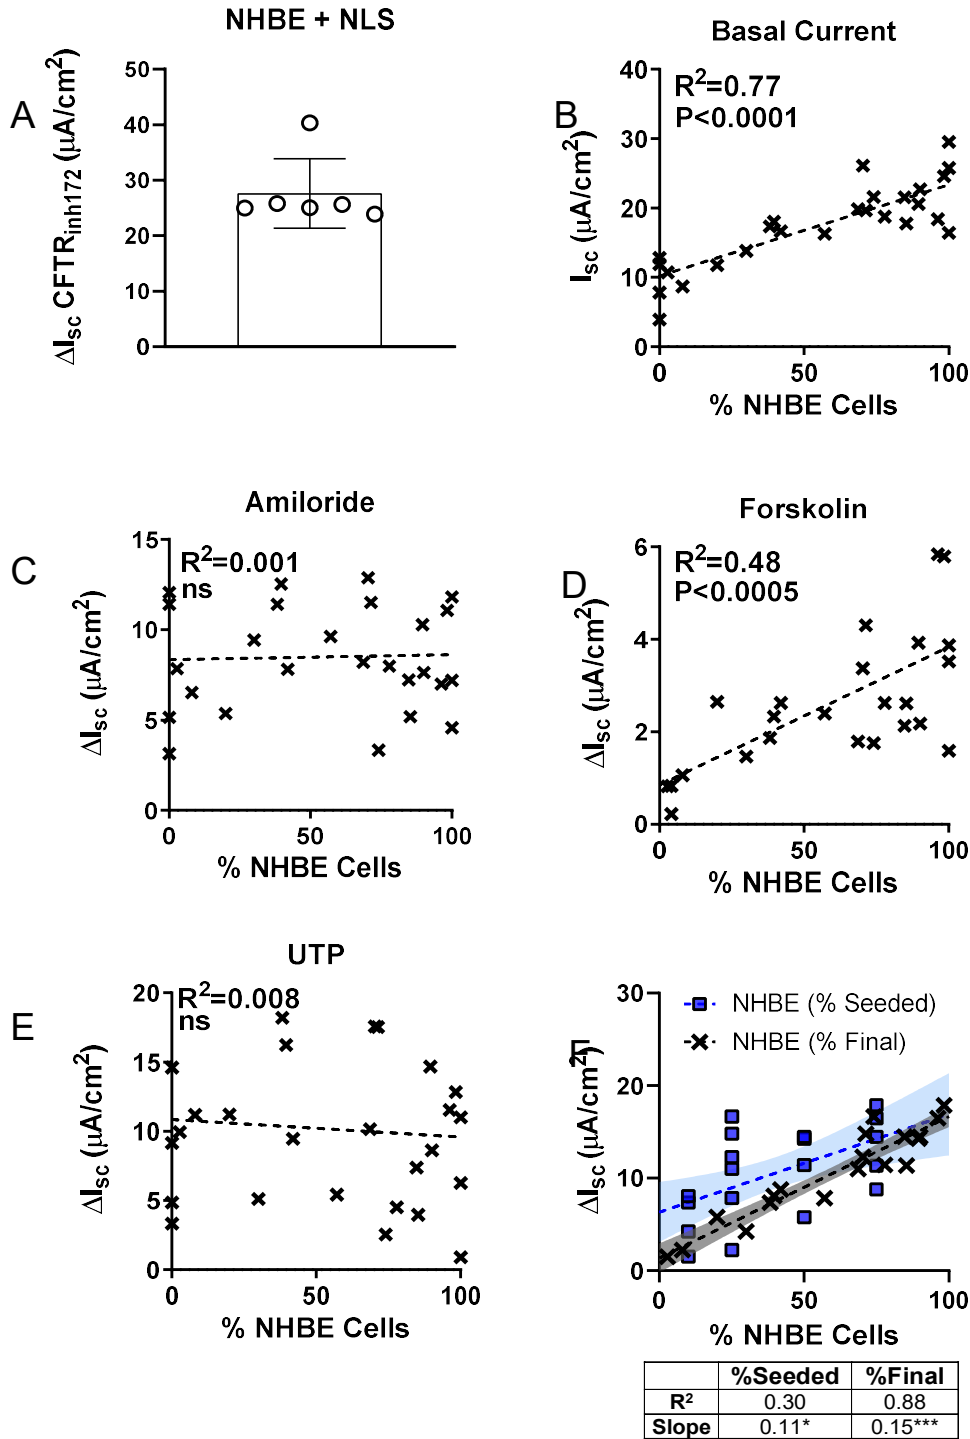

**Figure S3.** (A)  $\Delta I_{sc}$  after addition of CFTR<sub>inh</sub>172 (10  $\mu$ M) for NHBE exposed to NLS (n=6 from 3 non-CF donors).  $I_{sc}$  plotted against % NHBE:CFBE (n=8-12 from 3 CF donors for (B) basal and  $\Delta I_{sc}$  after addition with (C) amiloride, (D) forskolin or (E) UTP (10  $\mu$ M). Forskolin was added bilaterally, amiloride and UTP was added apically. The R<sup>2</sup> values and P value for slope significantly different from zero, are shown on the graphs. ns., not significantly different. (F) Summary of  $\Delta I_{sc}$  after addition of CFTR<sub>inh</sub>172 (10  $\mu$ M) for mixed cultures using % seeded values or % Final values, after exposure to CF sputum. Dotted lines show linear regression with 90% confidence intervals. R<sup>2</sup> values and significance values for variation of the slope from zero for each condition are shown in the table below \*: p<0.05; \*\*\*: p<0.001 (n=8-12 from 3 CF donors).

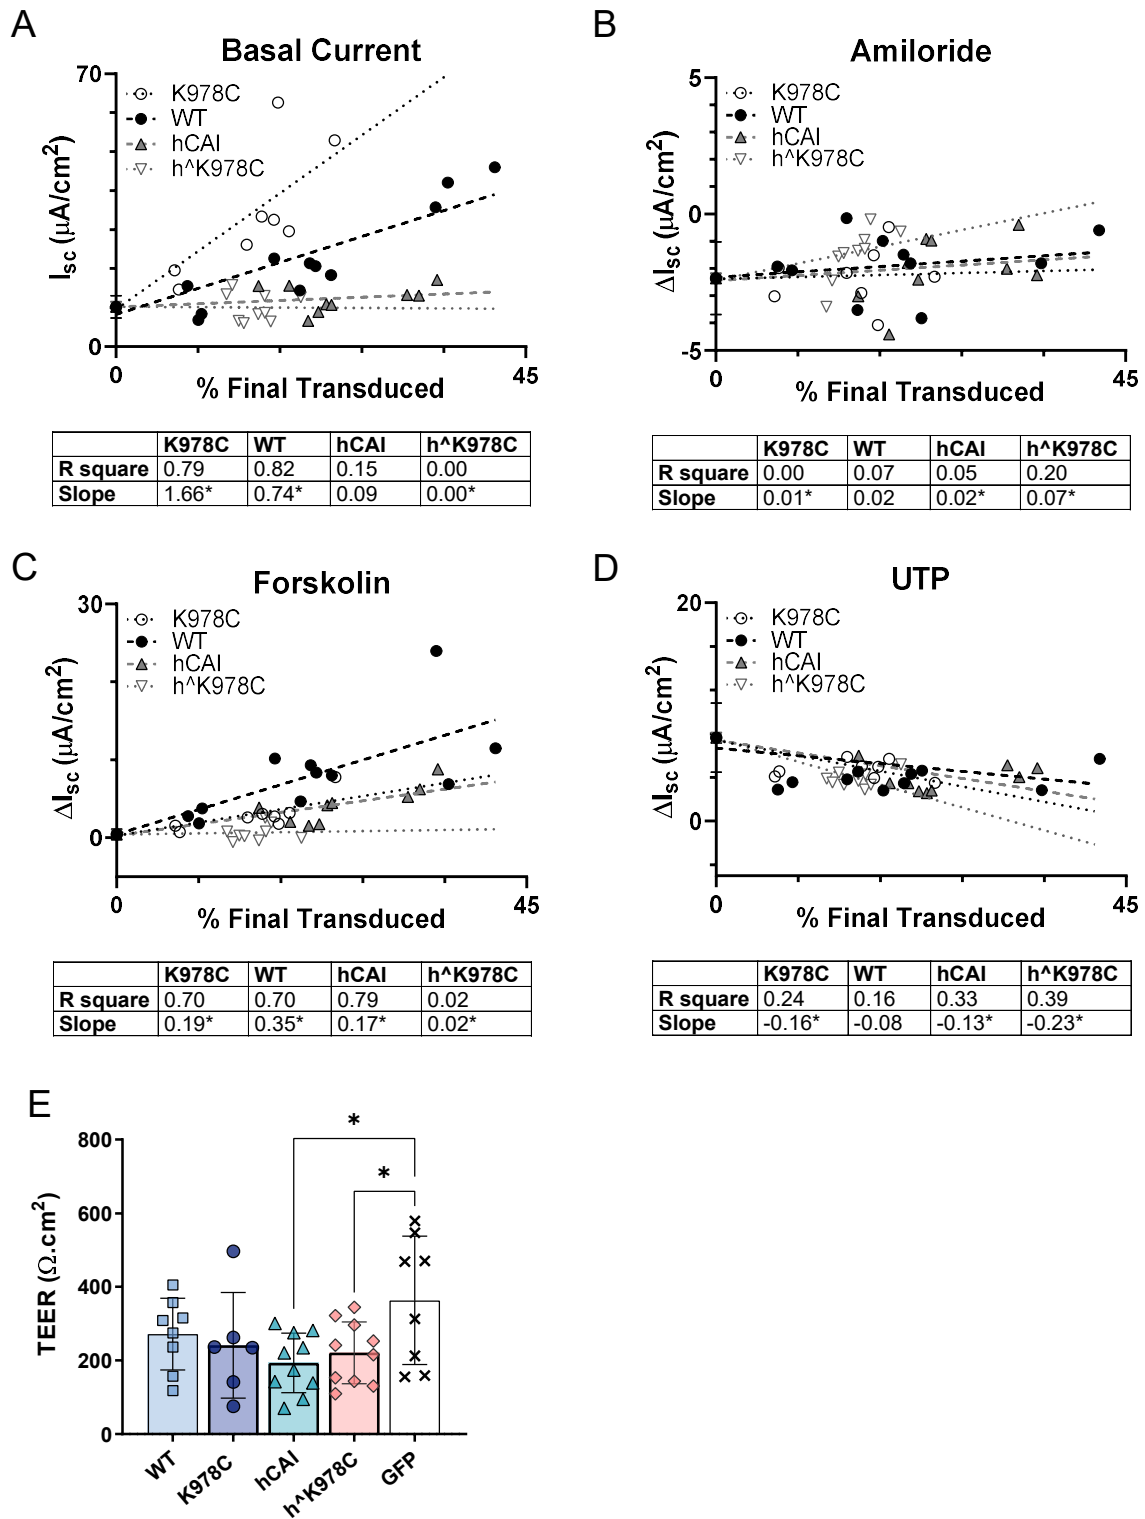

**Figure S4.**  $I_{sc}$  plotted against plotted against % final transduced for each CFTR variant for (A) basal or (B)  $\Delta I_{sc}$  after addition of amiloride (10  $\mu$ M), (C) forskolin (10  $\mu$ M) and (D) UTP (10  $\mu$ M). All drugs were added apically except forskolin which was bilateral. Dotted lines show linear regression with  $R^2$  values and significance values for variation of the slope from zero for each CFTR cDNA are shown in the table below \*:  $p < 0.05$ ; \*\*:  $p < 0.01$ ; \*\*\*:  $p < 0.001$  ( $n = 8-12$  from 3 CF donors). (E) TEER measurements of transduced CFBE cultures after CFS exposure from. Data are presented as mean  $\pm$  SD;  $p < 0.05$  ( $n = 8-12$  from 3 CF donors: 1-W1282X/R1162X, 2-DF508/DF508<sub>7</sub>, 3-W1282X/R1162X).



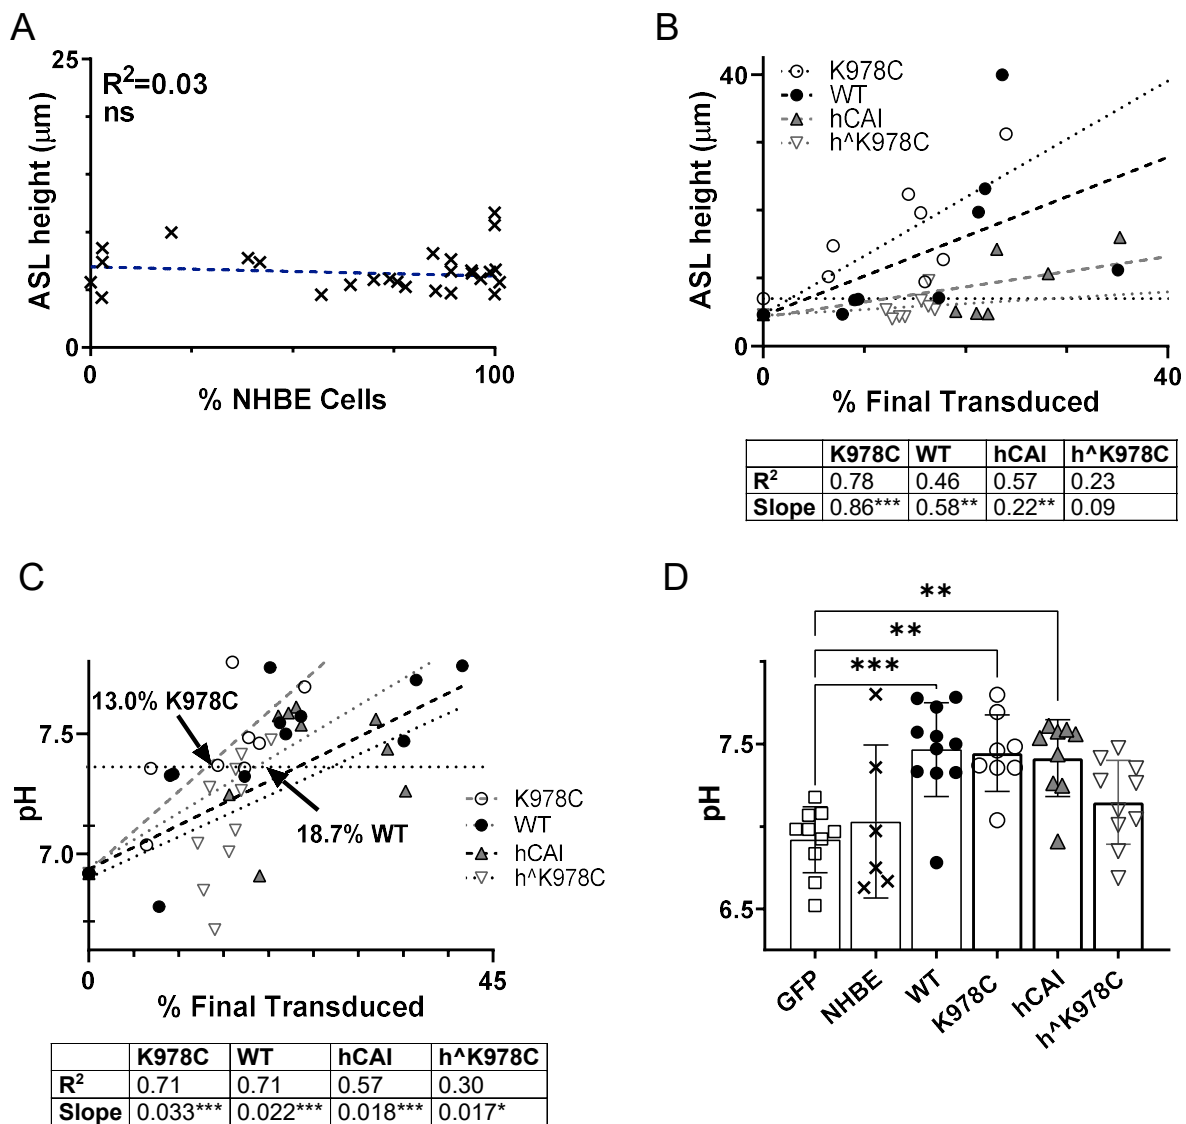

**Figure S5.** (A) ASL height ( $\mu\text{m}$ ) in the presence of CFS before stimulation with vasoactive intestinal peptide (VIP) Plotted against % NHBE:CFBE ( $n=8-12$  from 3 CF donors Data were subject to linear regression. (B) ASL height measured in CFBE transduced with CFTR cDNAs in the presence of CFS before stimulation with VIP. Dotted lines show linear regression with Slope, R square values and significance values for variation of the slope from zero. (C) ASL pH, after exposure to CF sputum and stimulation with vasoactive intestinal peptide (VIP), plotted against % final NHBE or % final transduced CFBE for CFTR variants. Dotted lines show linear regression for each CFTR variant. (D) ASL pH for all conditions, regardless of the rate of transduction. Data are shown as mean  $\pm$  SD with individual data points for  $n=6-11$  from 3 CF donors and 3 non-CF donors. Treatments were compared by two-way ANOVA with Tukey's post hoc analyses; significantly increased as compared to CFBE are shown \*\*:  $p<0.01$ ; \*\*\*:  $p<0.001$

## **Supplemental videos**

### **Video S1: Video Abstract**

**Video S2:** WT-CFTR transduced CFBE, immunostained with phalloidin (F-actin; red), anti- $\beta$ -tubulin (cilia; yellow), GFP (transduced cells; green) and DAPI (blue).

**Video S3:** hCAI-CFTR transduced CFBE, immunostained with phalloidin (F-actin; red), anti- $\beta$ -tubulin (cilia; yellow), GFP (transduced cells; green) and DAPI (blue).

**Video S4:** K978C-CFTR transduced CFBE, immunostained with phalloidin (F-actin; red), anti- $\beta$ -tubulin (cilia; yellow), GFP (transduced cells; green) and DAPI (blue).

**Video S5:** h<sup>K978C</sup>-CFTR transduced CFBE, immunostained with phalloidin (F-actin; red), anti- $\beta$ -tubulin (cilia; yellow), GFP (transduced cells; green) and DAPI (blue).

**Video S6:** CFBE, immunostained with phalloidin (F-actin; red), anti- $\beta$ -tubulin (cilia; yellow), GFP (transduced cells; green) and DAPI (blue).
